# Supplementary material for: Effect of equilibration time on the structural gradient in the vertical direction for bicontinuous microemulsions in Winsor-III and -IV systems
Source: Royal Society of Chemistry journal article supplement (doi:10.1039/d3sm01741a), 2024-01-01
Supplement: d3sm01741a1.pdf [file d3sm01741a1.pdf]

**Supporting Information for:**

Effect of Equilibration Time on the Structural Gradient in the Vertical Direction for  
Bicontinuous Microemulsions in Winsor-III and -IV Systems

Douglas G. Hayes<sup>\*,1</sup>, Brian A. Barth<sup>2</sup> and S. Venkatesh Pingali<sup>\*,3</sup>

<sup>1</sup> Department of Biosystems Engineering and Soil Science, University of Tennessee, 2506 E.J.  
Chapman Drive, Knoxville, TN 37996-4531, [dhayes1@utk.edu](mailto:dhayes1@utk.edu), 1-865-974-7991

<sup>2</sup> Department of Chemical and Biomolecular Engineering, University of Tennessee, 1512 Middle  
Dr, Knoxville, TN 37996, [bbarth@vols.utk.edu](mailto:bbarth@vols.utk.edu)

<sup>3</sup> Oak Ridge National Laboratory, 1 Bethel Valley Road, Oak Ridge, TN 37831,  
[pingalis@ornl.gov](mailto:pingalis@ornl.gov)

1 April 2024

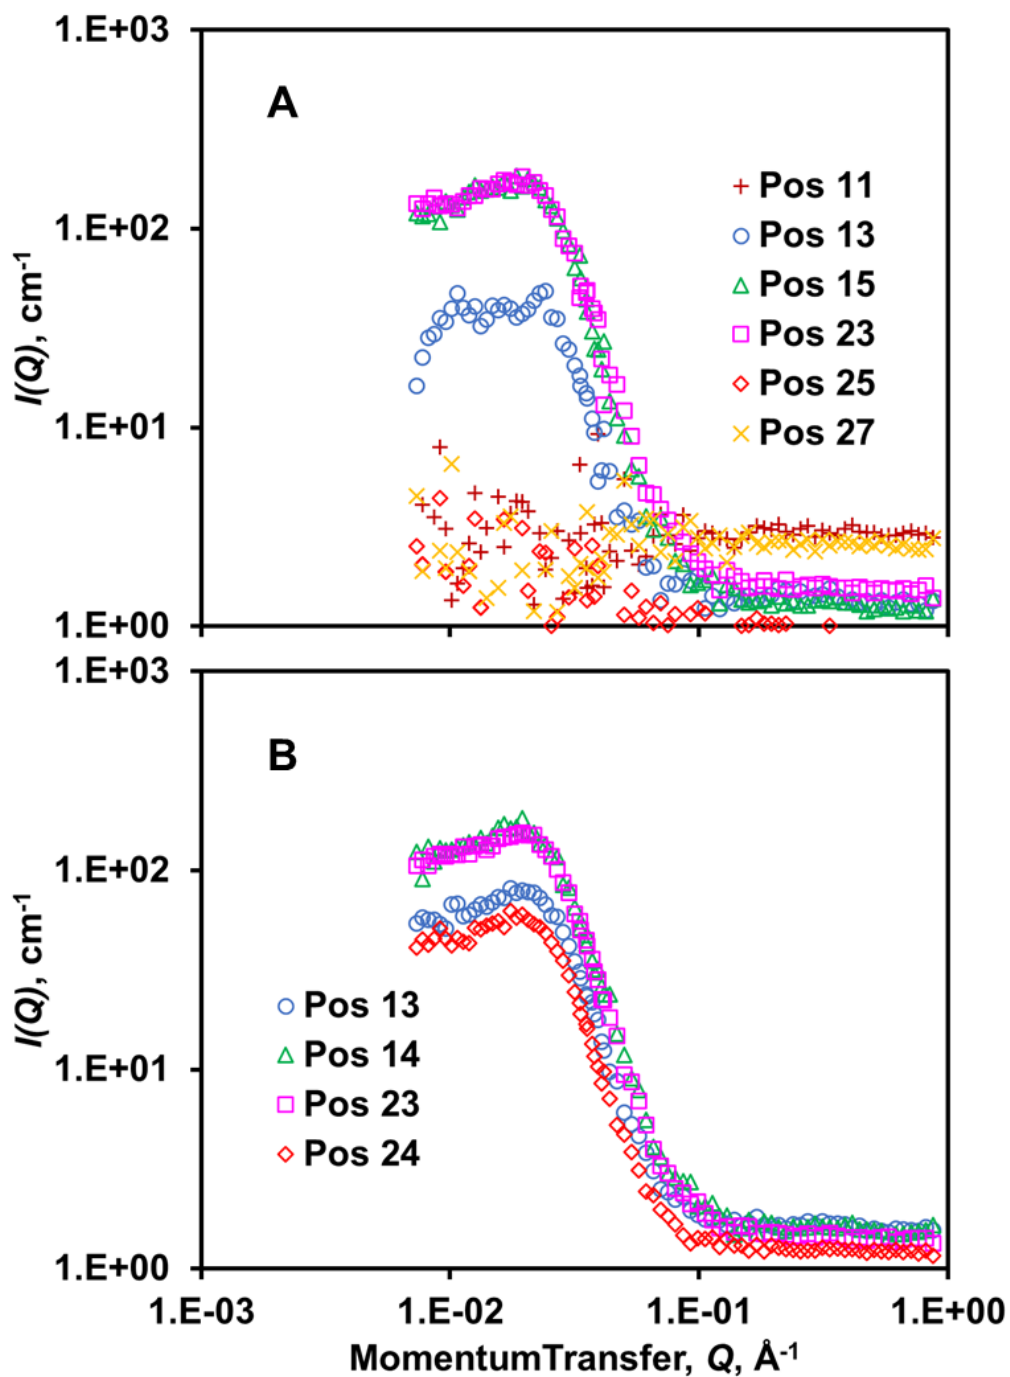

**Figure S1.** SANS data ( $Q$  vs.  $I(Q)$ ) for vertical stage positions 9-15 and 23-27, showing that the bicontinuous phase is located within positions 14 mm to 23 mm, near the top and bottom liquid-liquid interfaces, respectively. Equilibration times: **A** 10 min, cycle 1 (0.5 h) and **B** 1 day, cycle 1 (24.2 h).

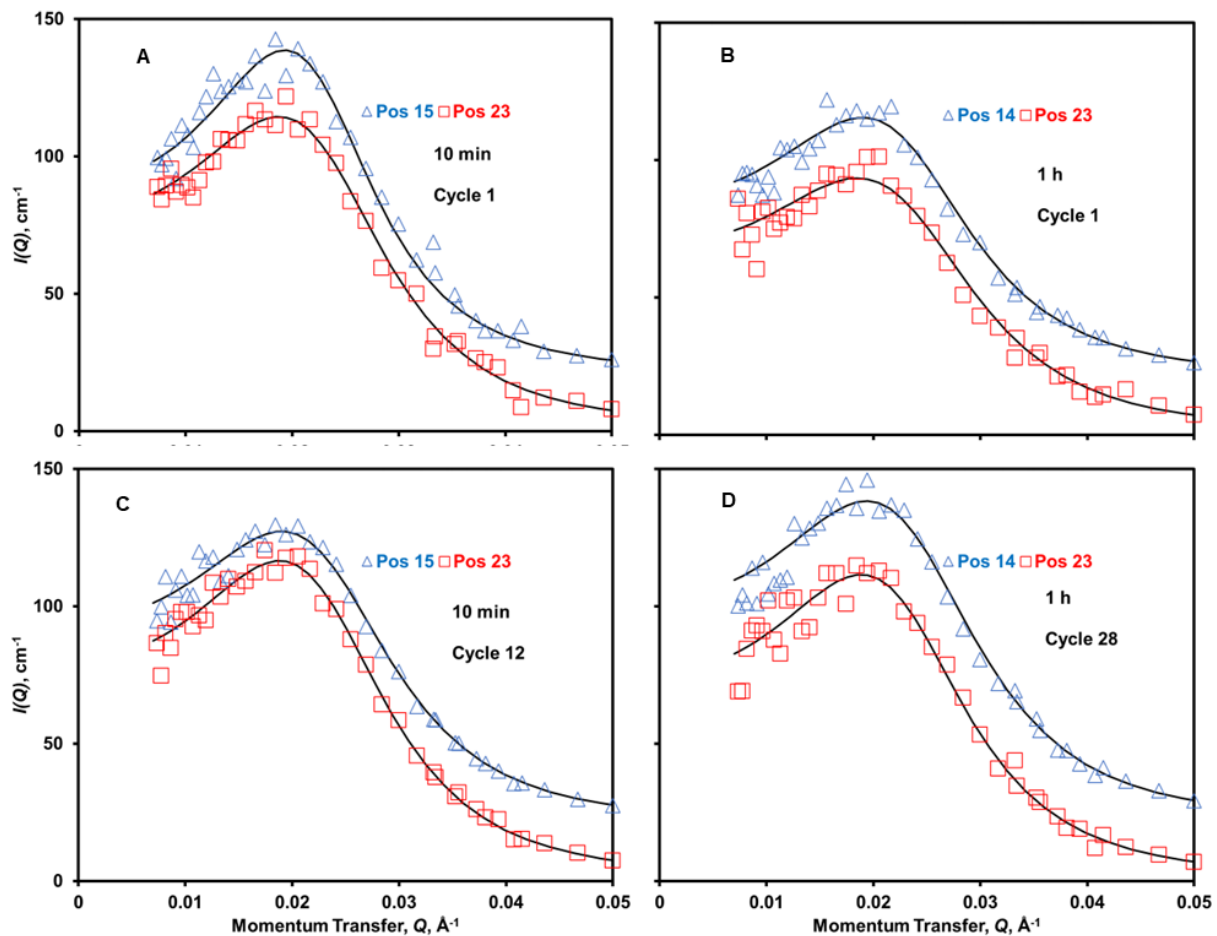

**Figure S2.** Teubner-Strey (TS) model fit to SANS data ( $Q$  vs.  $I(Q)$ ) for vertical stage positions 14 mm or 15 mm (near the upper liquid-liquid interface) and 23 mm (near the lower interface) and the indicated equilibration time (10 min or 1 h) and cycle number. A constant,  $20 \text{ cm}^{-1}$ , was added to  $I(Q)$  for position 14 mm or 15 mm to increase clarity. Total times for 10 min equilibration: cycle 1 = 0.5 h, cycle 12 = 1.6 h; m 1 h equilibration: cycle 1 = 1.1 h, cycle 28 = 10.1 h

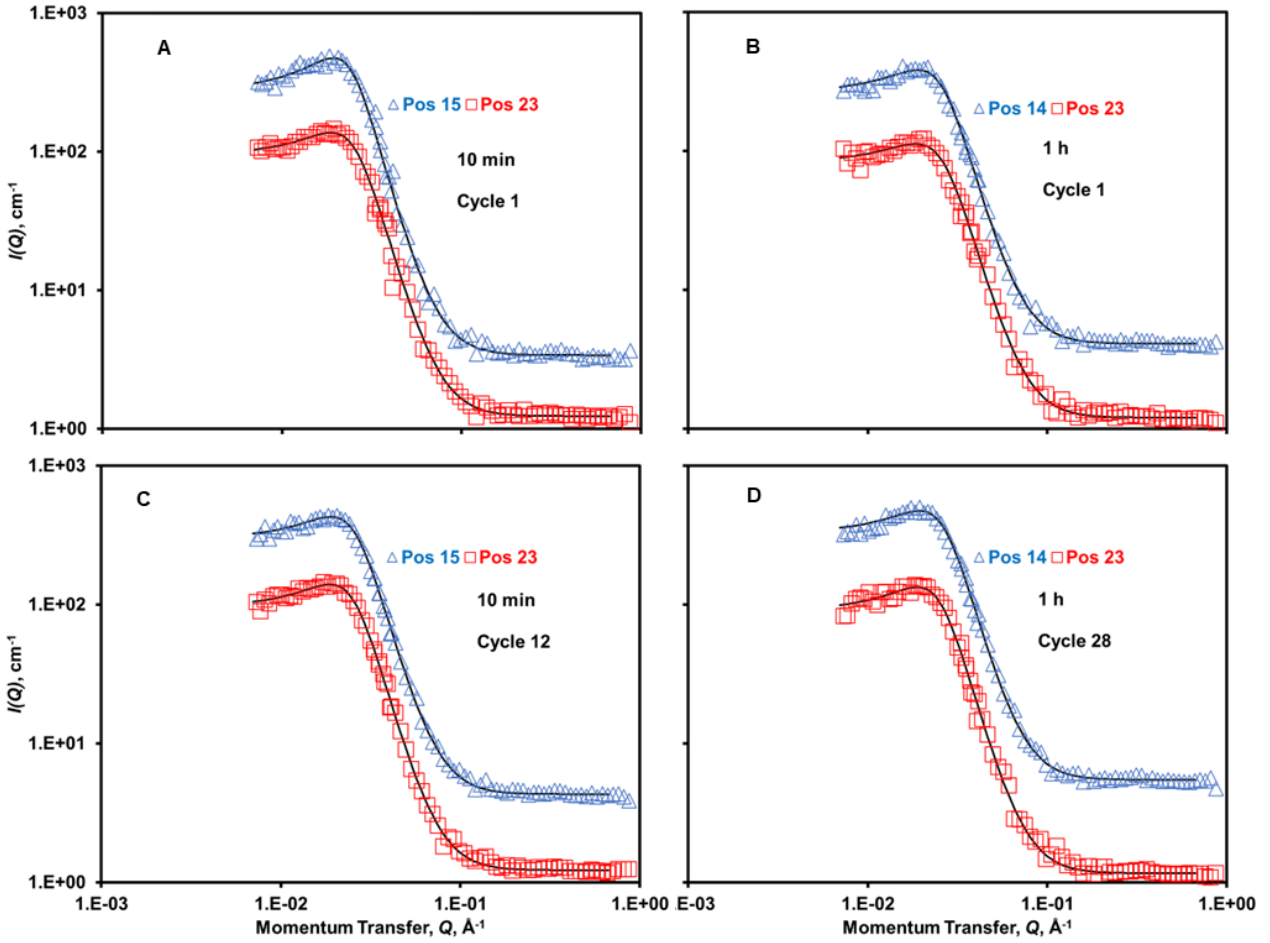

**Figure S3.** Teubner-Strey (TS) model fit to SANS data ( $\log Q$  vs.  $\log I(Q)$ , log-log coordinates) for vertical stage positions 14 mm or 15 mm (near the upper liquid-liquid interface) and 23 mm (near the lower interface) and the indicated equilibration time (10 min or 1 h) and cycle number. A constant, 4 and 1.2, was multiplied to  $I(Q)$  for position 14 mm or 15 mm and 23 mm, respectively, to increase clarity. This is a replotting of Figure S2 data on log-log coordinates. Total times for 10 min equilibration: cycle 1 = 0.5 h, cycle 12 = 1.6 h; 1 h equilibration: cycle 1 = 1.1 h, cycle 28 = 10.1 h

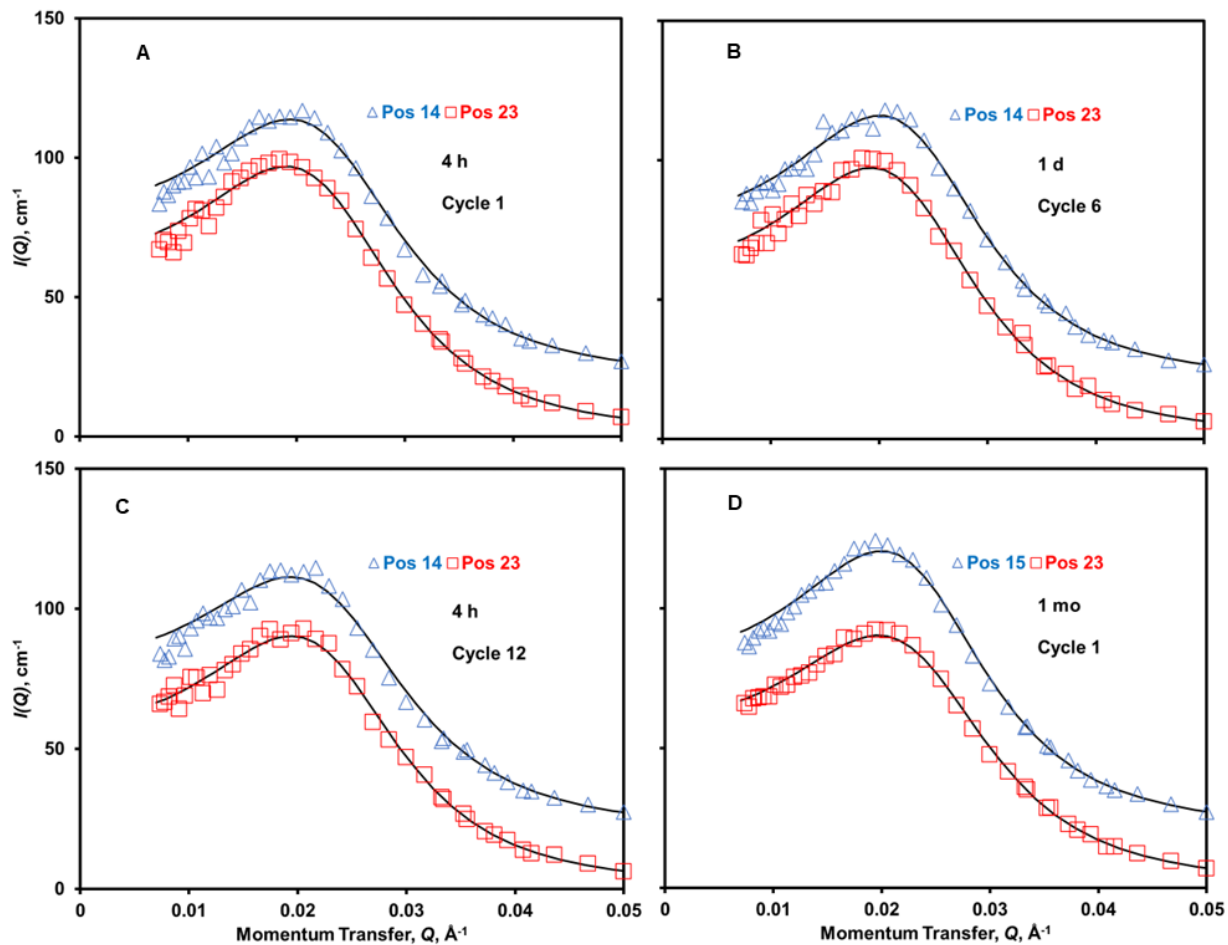

**Figure S4.** Teubner-Strey (TS) model fit to SANS data ( $Q$  vs.  $I(Q)$ ) for vertical stage positions 14 mm (near the upper liquid-liquid interface) and 23 mm (near the lower interface) and the indicated equilibration time (4 h, 1 d, or 1 mo) and cycle number. A constant,  $20 \text{ cm}^{-1}$ , was added to  $I(Q)$  for position 14 mm to increase clarity. Total times for 4 h equilibration: cycle 1 = 4.4 h, cycle 12 = 15.1 h; 1 d: cycle 6 = 28.8 h; 1 mo = 745 h.

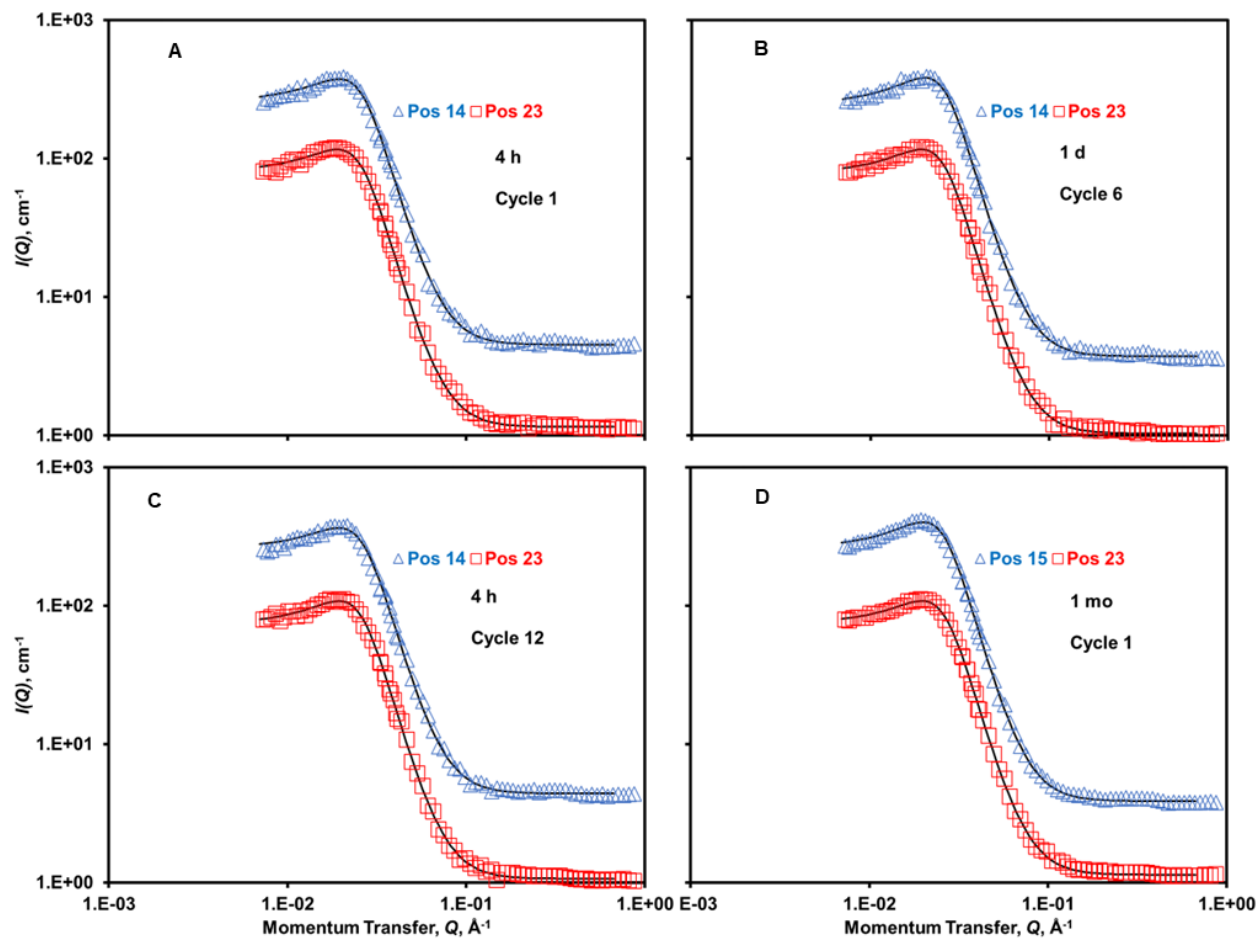

**Figure S5.** Teubner-Strey (TS) model fit to SANS data ( $\log Q$  vs.  $\log I(Q)$ , log-log coordinates) for vertical stage positions 14 mm (near the upper liquid-liquid interface) and 23 mm (near the lower interface) and the indicated equilibration time (4 h, 1 d, or 1 mo) and cycle number. A constant, 4 and 1.2, was multiplied to  $I(Q)$  for position 14 mm and 23 mm, respectively, to increase clarity. This is a replotting of Figure S4 data on log-log coordinates. Total times for 4 h equilibration: cycle 1 = 4.4 h, cycle 12 = 15.1 h; 1 d: cycle 6 = 28.8 h; 1 mo: 745 h.

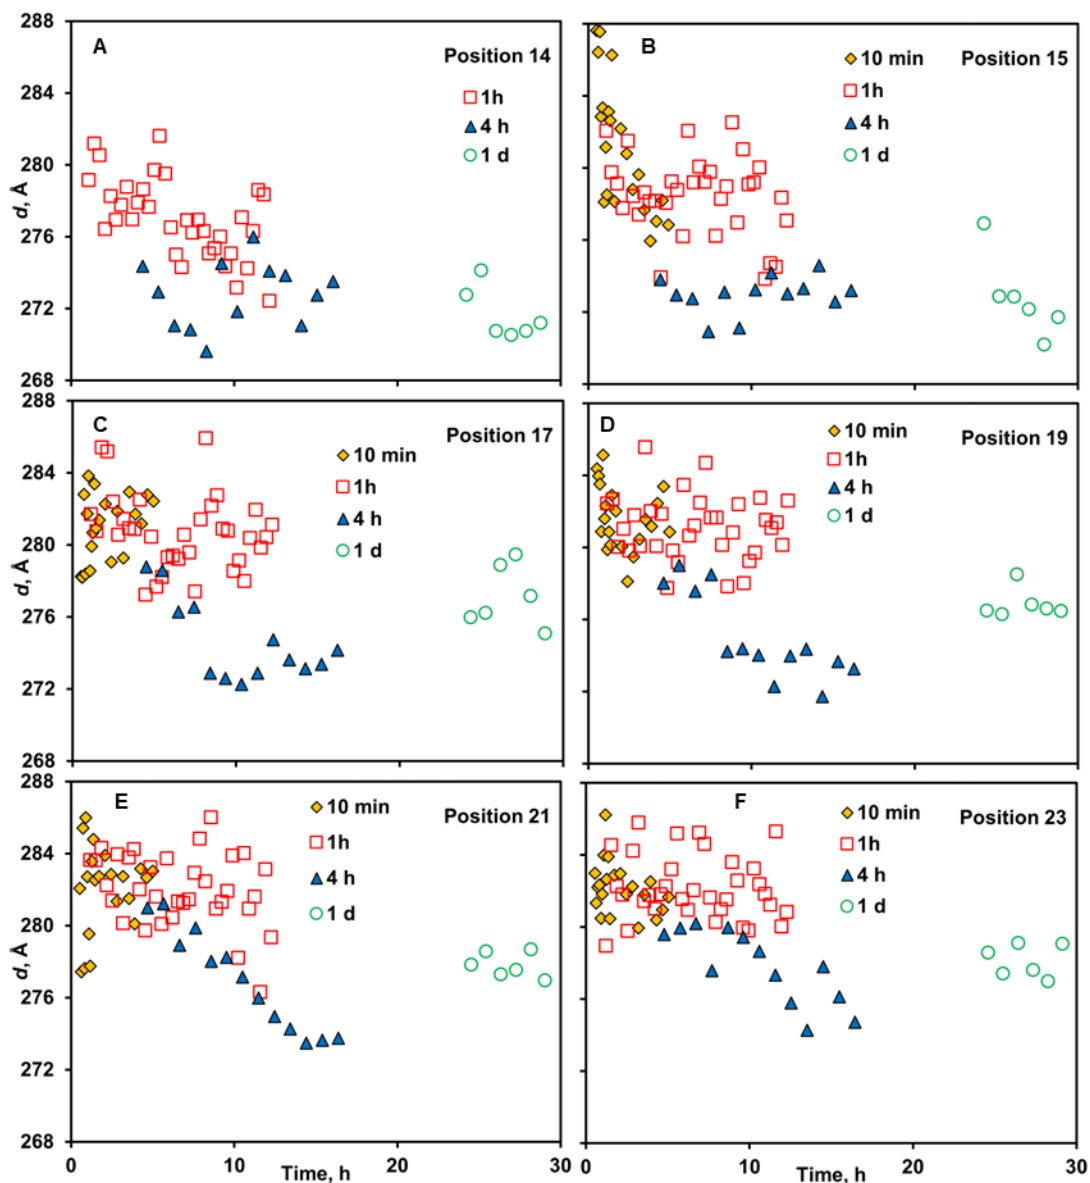

**Figure S6.** Effect of equilibration (legend) and relaxation times on the quasi-periodic repeat distance,  $d$ , for the middle, bicontinuous phase, of  $W_{III}$  systems formed by the Water/SDS/1-pentanol/dodecane system at 22°C for different vertical stage positions. Abscissa represents the total (equilibration + relaxation) time. Positions 14 mm and 23 mm are near the upper and lower liquid-liquid interfaces, respectively.

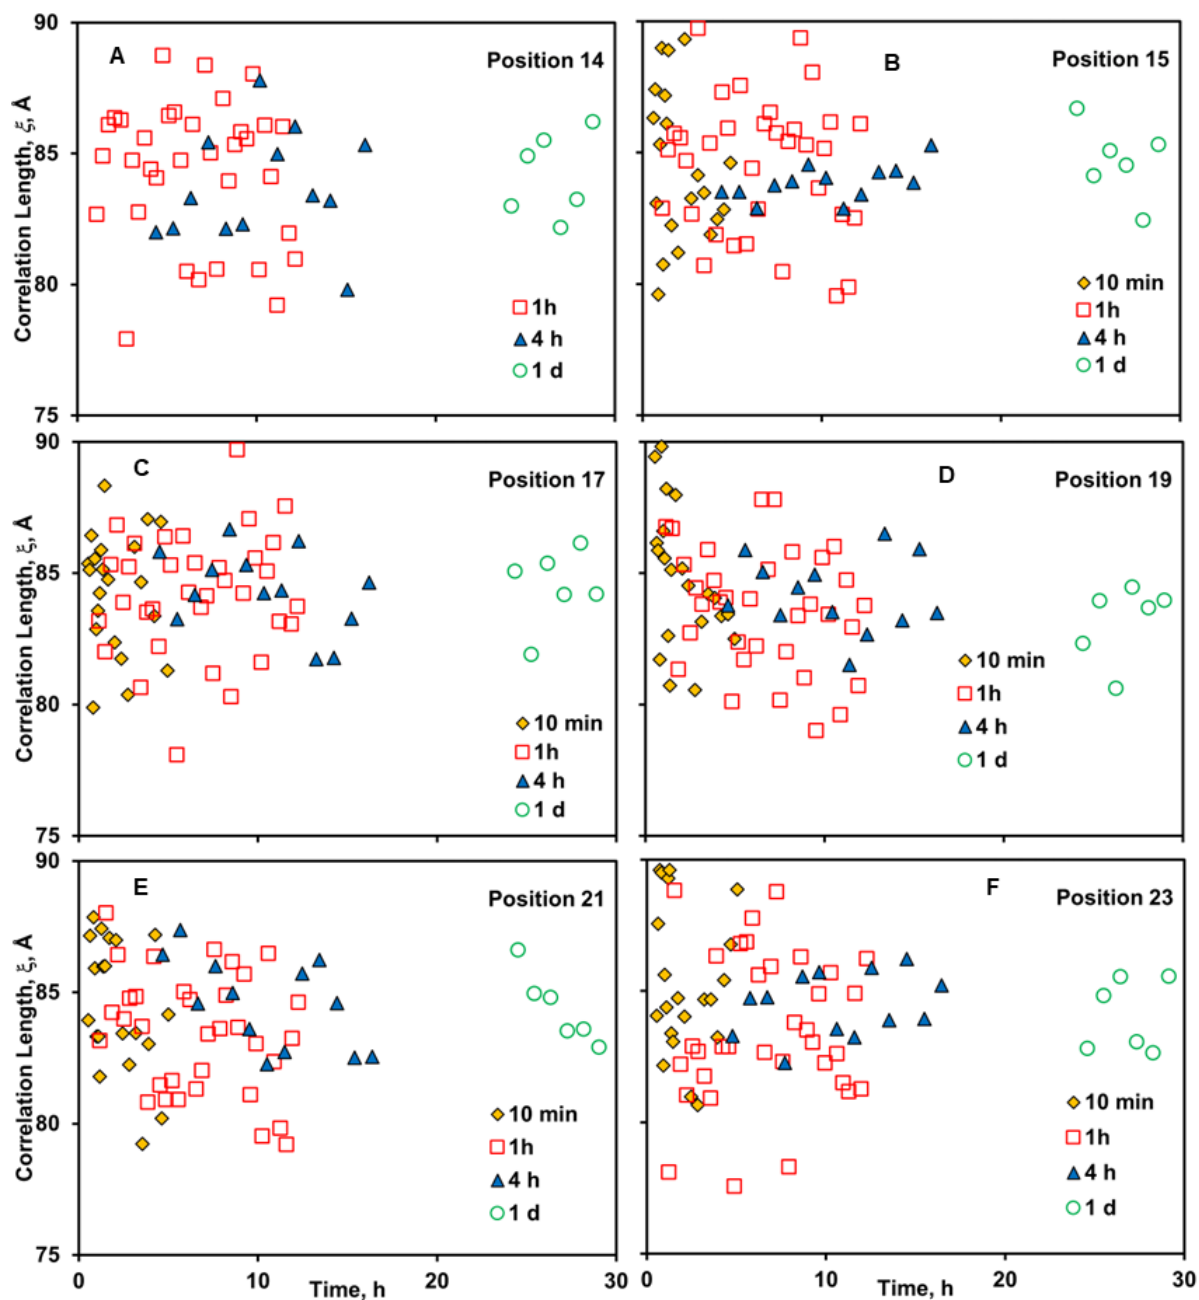

**Figure S7.** Effect of equilibration (legend) and relaxation times on the correlation coefficient,  $\xi$ , for the middle, bicontinuous phase, of  $W_{III}$  systems formed by the Water/SDS/1-pentanol/dodecane system at 22°C for different vertical stage positions. Abscissa represents the total (equilibration + relaxation) time. Positions 14 mm and 23 mm are near the upper and lower liquid-liquid interfaces, respectively.



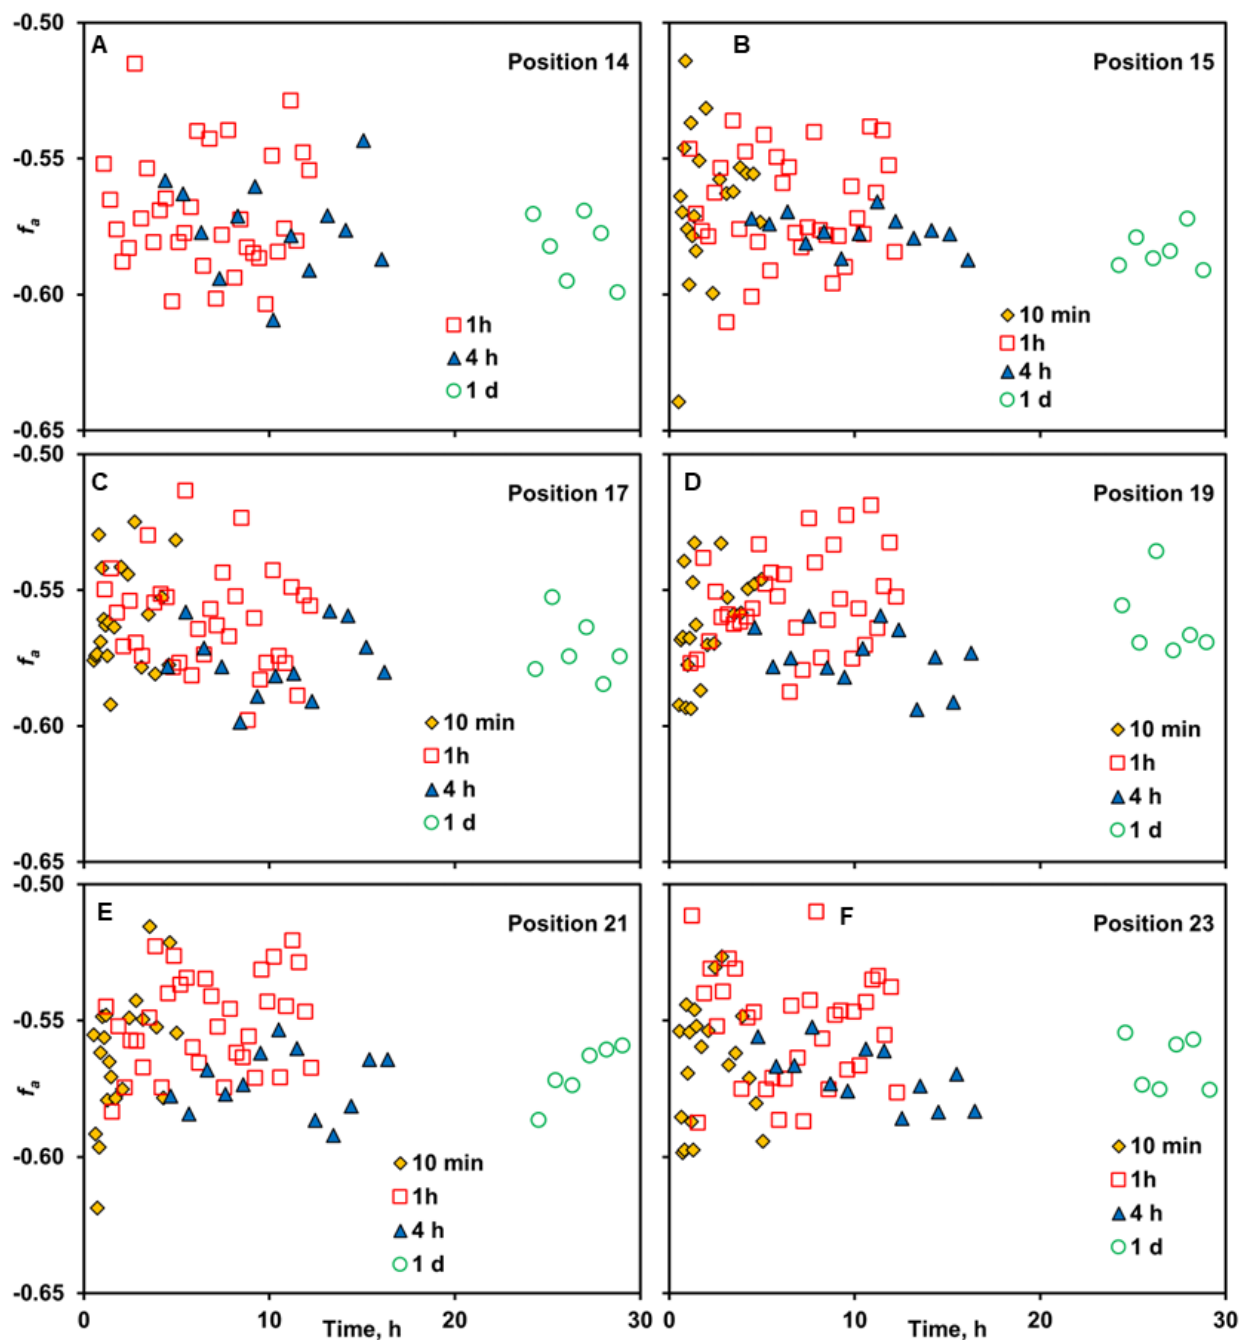

**Figure S8.** Effect of equilibration (legend) and relaxation times on the amphiphilicity factor,  $f_a$  for the middle, bicontinuous phase, of  $W_{III}$  systems formed by the Water/SDS/1-pentanol/dodecane system at 22°C for different vertical stage positions. Abscissa represents the total (equilibration + relaxation) time. Positions 14 mm and 23 mm are near the upper and lower liquid-liquid interfaces, respectively.

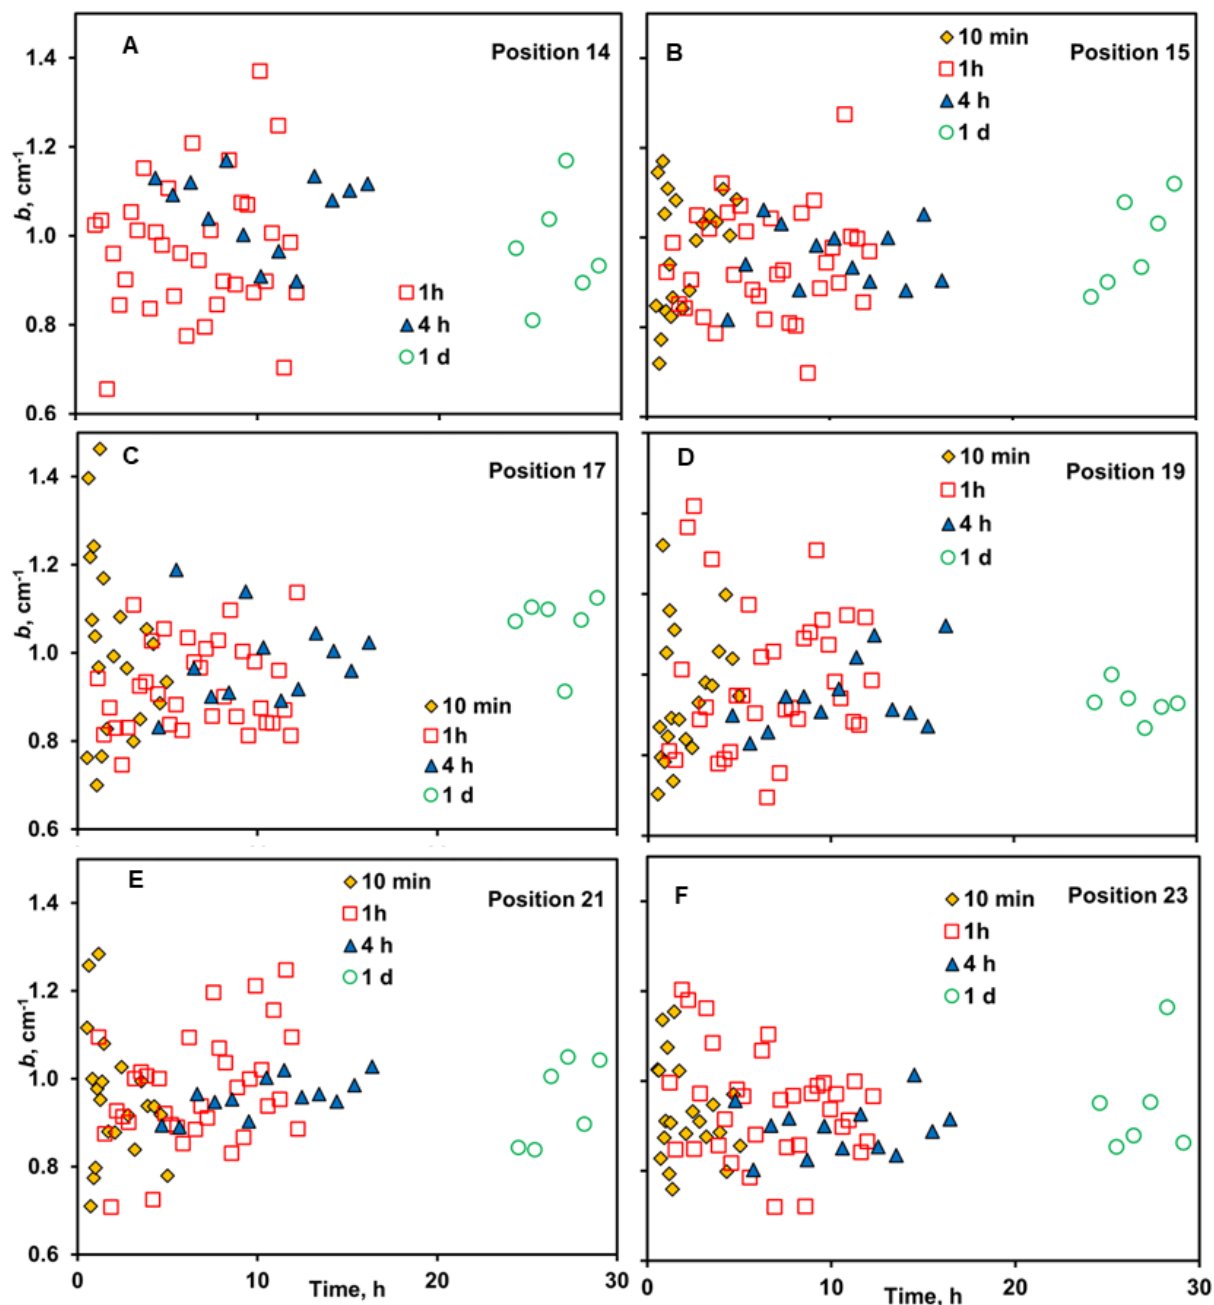

**Figure S9.** Effect of equilibration (legend) and relaxation times on the background,  $b$ , for the middle, bicontinuous phase, of  $W_{III}$  systems formed by the Water/SDS/1-pentanol/dodecane system at 22°C for different vertical stage positions. Abscissa represents the total (equilibration + relaxation) time. Positions 14 mm and 23 mm are near the upper and lower liquid-liquid interfaces, respectively.

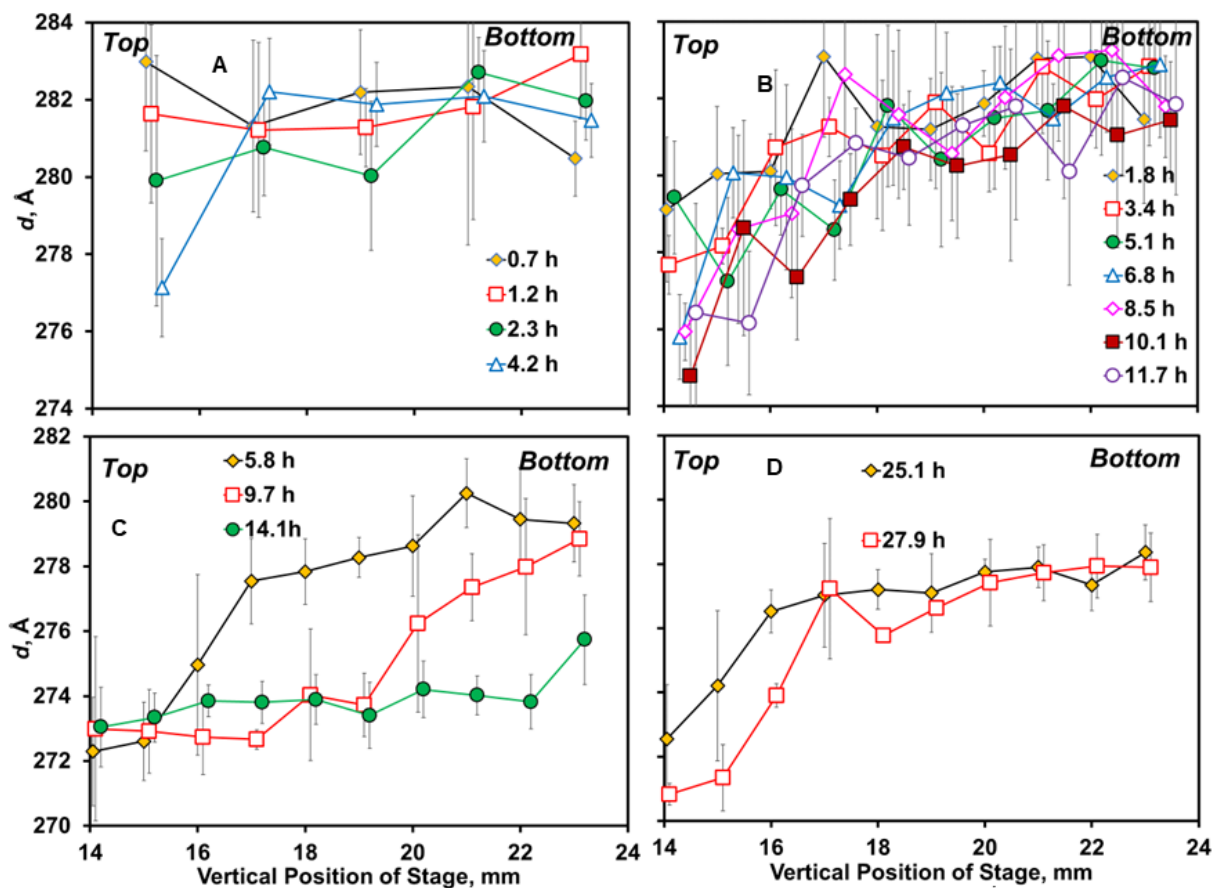

**Figure S10.** Effect of time for equilibration and relaxation on the change of the quasi-periodic repeat distance,  $d$ , for the middle, bicontinuous phase, of  $W_{III}$  systems formed by the Water/SDS/1-pentanol/dodecane system at 22°C vs. vertical stage position. Positions 14 mm and 23 mm are near the top and bottom liquid-liquid interfaces, respectively. Figs A-D represent equilibration times of 10 min, 1 h, 4 h, and 1 d, respectively, while legends represent total (equilibration + relaxation) time. Each data series represents the average of 5 consecutive relaxation cycles for 10 min and 1 h, 4 cycles for 4 h, and 3 cycles for 1 d. Replotting of Fig. 2, but with error bars (standard deviation of the means) provided. Vertical stage positions were increased by 0.1 mm to improve visualization.

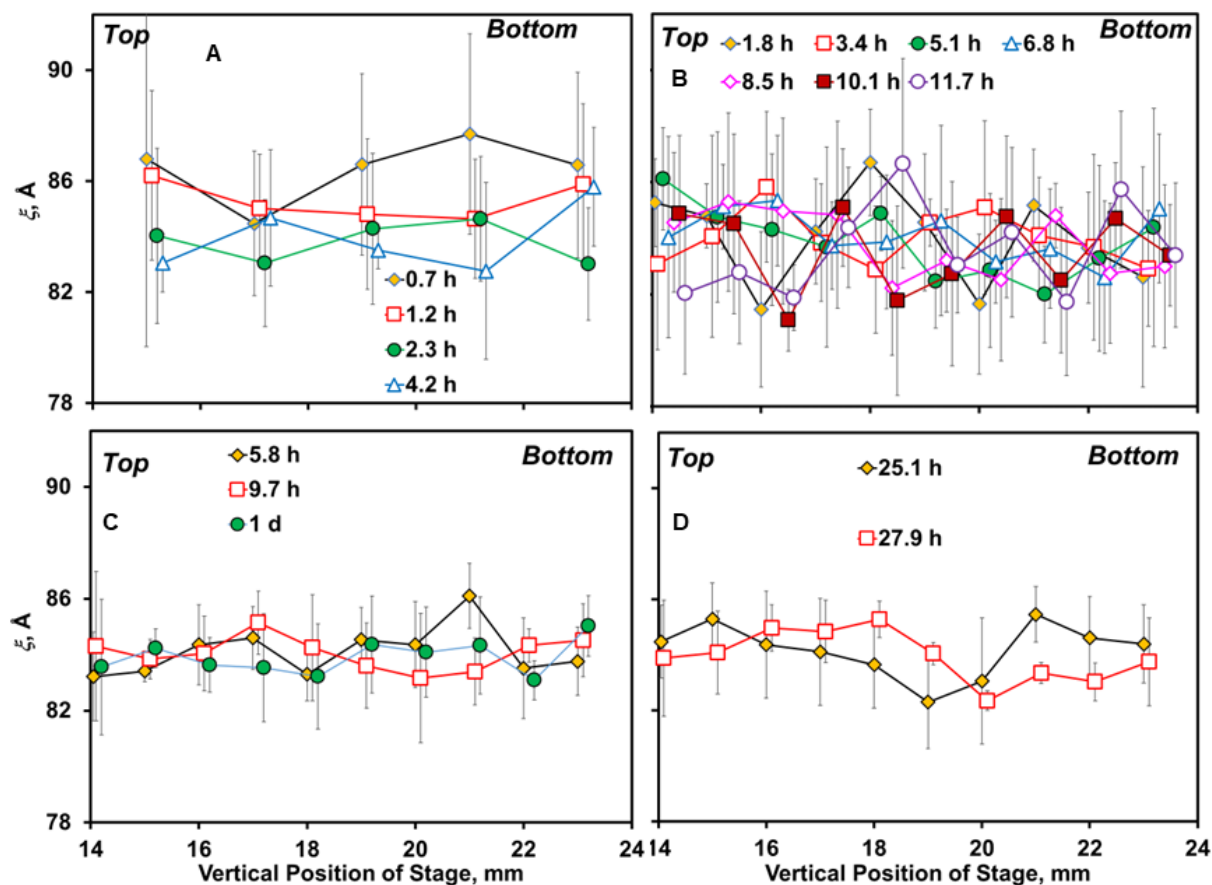

**Figure S11.** Effect of equilibration and relaxation times on the change of the correlation coefficient,  $\xi$ , for the middle, bicontinuous phase, of  $W_{III}$  systems formed by the Water/SDS/1-pentanol/dodecane system at 22°C vs. vertical stage position. Positions 14 mm and 23 mm are near the top and bottom liquid-liquid interfaces, respectively. Figs A-D represent equilibration times of 10 min, 1 h, 4 h, and 1 d, respectively, while legends represent total (equilibration + relaxation) time. Each data series represents the average of 5 consecutive relaxation cycles for 10 min and 1 h, 4 cycles for 4 h, and 3 cycles for 1 d. Replotting of Fig. 3, but with error bars (standard deviation of the means) provided. Vertical stage positions were increased by 0.1 mm to improve visualization.

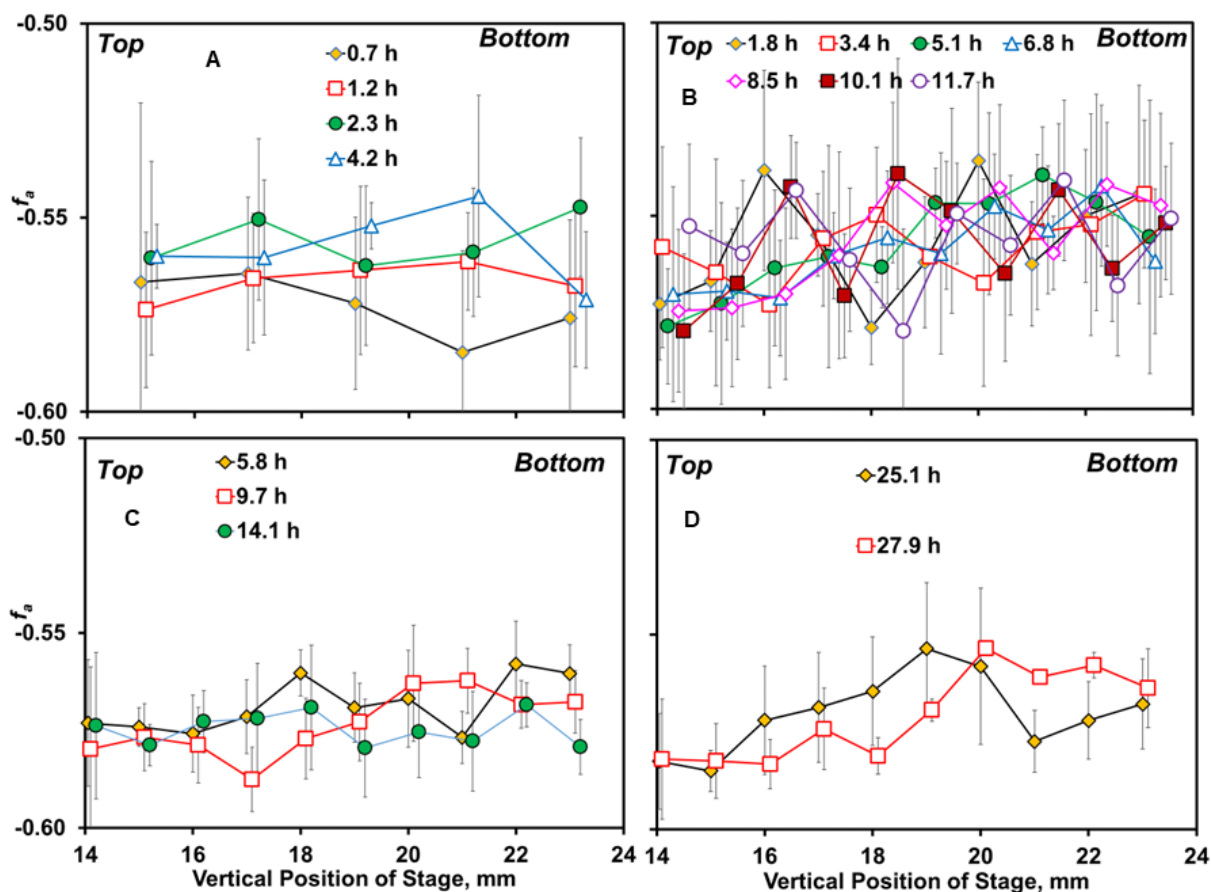

**Figure S12.** Effect of equilibration and relaxation times on the change of the amphiphilicity factor,  $f_a$ , for the middle, bicontinuous phase, of  $W_{III}$  systems formed by the Water/SDS/1-pentanol/dodecane system at 22°C vs. vertical stage position. Positions 14 mm and 23 mm are near the top and bottom liquid-liquid interfaces, respectively. Figs A-D represent equilibration times of 10 min, 1 h, 4 h, and 1 d, respectively, while legends represent total (equilibration + relaxation) time. Each data series represents the average of 5 consecutive relaxation cycles for 10 min and 1 h, 4 cycles for 4 h, and 3 cycles for 1 d. Replotting of Fig. 4, but with error bars (standard deviation of the means) provided. Vertical stage positions were increased by 0.1 mm to improve visualization.

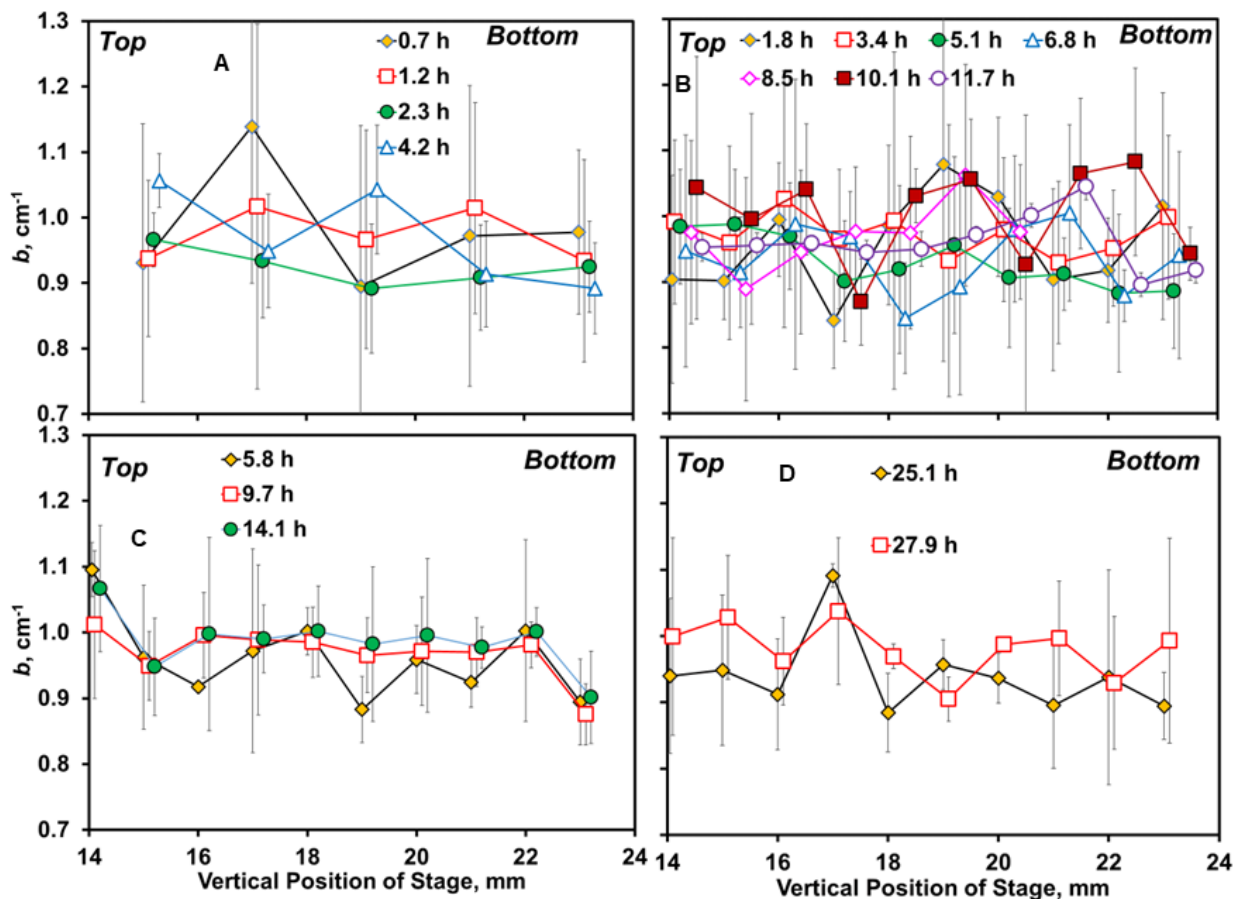

**Figure S13.** Effect of equilibration and relaxation times on the change of the background,  $b$ , for the middle, bicontinuous phase, of  $W_{III}$  systems formed by the Water/SDS/1-pentanol/dodecane system at 22°C vs. vertical stage position. Positions 14 mm and 23 mm are near the top and bottom liquid-liquid interfaces, respectively. Figs A-D represent equilibration times of 10 min, 1 h, 4 h, and 1 d, respectively, while legends represent total (equilibration + relaxation) time. Each data series represents the average of 5 consecutive relaxation cycles for 10 min and 1 h, 4 cycles for 4 h, and 3 cycles for 1 d. Replotting of Fig. 5, but with error bars (standard deviation of the means) provided. Vertical stage positions were increased by 0.1 mm to improve visualization.
